# Supplementary material
Source: Springer Nature journal article supplement (https://www.springermedizin.de/resource/supplementary/13020_2011_136_MOESM2_ESM.pdf/9641054)
Supplement: MOESM2 [file 9641054]

Lodoicea\_maldivica\_RM  
Sample\_H  
-----  
CCCGGAAGCTCGACTTTGATGCTTATGTTGGTATGTCACCTTGCCAAAGC 50

Lodoicea\_maldivica\_RM  
Sample\_H  
-----GGCAGTGCCTTATTTGTTGGTG 23  
ACCTAGTTTGTGGTACTTGAAGAATTGGCAGAGCTATAATTTGTTGGTA 100  
\*\*\*\*\* \*\* \* \*\*\*\*\*

Lodoicea\_maldivica\_RM  
Sample\_H  
TAATATAGAGCATTGCCATTAGTGGTGATTGATATATATAGTAATCTACT 73  
TAATATAGAGCAGTATCATTAGTGTGATCGCGAATATAGTAATATACT 150  
\*\*\*\*\* \* \*\*\*\*\* \*\* \* \*\*\*\*\*

Lodoicea\_maldivica\_RM  
Sample\_H  
TCTATATATAGCAAATGCTTCATAAATAAACTAACCTAATAAACAAAGGA 123  
TCAGTATGTAGCAAATGCTTCATAAAAAAACCACTAGCTAGCAAAGAA 200  
\*\* \*\* \*\*\*\*\* \*\*\*\*\* \* \*\*\*\*\*

Lodoicea\_maldivica\_RM  
Sample\_H  
TCTGATCGATAAAGGTCAAATAATGCACAAAACATACTGGACTC-----A 168  
TCTGATCGATAA--GTCAAATAATGCACAAGACCTACTGGACTGGACTAA 248  
\*\*\*\*\* \*\*\*\*\* \*\* \*\*\*\*\*

Lodoicea\_maldivica\_RM  
Sample\_H  
AAATATACTCTTACTTCATGTGCAATT--TTGTTGACACCTGTTTTTTTC 217  
AAATATAATGTTACTTCATGTGCAAACATTTTTTGGTACC--TTTTCTA 296  
\*\*\*\*\* \* \*\*\*\*\* \*\* \*\* \*\* \*\*\*\*\*

Lodoicea\_maldivica\_RM  
Sample\_H  
AAAAAAGAAAGGAGAGGAGGGGAGGGTGAGAGTCACCTGATTCATTGAA 267  
AAAGAAAGAGAGGGTGAGGGGTAGGCGAACCCACCCGTTTCATTGAG 346  
\*\*\* \*\*\*\*\* \* \* \* \*\*\*\*\* \*\* \*\* \*\*\*\*\*

Lodoicea\_maldivica\_RM  
Sample\_H  
ATAATGAGACAAGTAGTTATGTTGCATCTCATGTTCTTCAGATATCTGAA 317  
ATAATGAGACAATTAGATATGCTGAGTCTTAT-----ACATATCAGAA 389  
\*\*\*\*\* \*\* \*\* \*\* \*\* \*\* \*\* \*\* \*\* \*\* \* \*\*\*\*\*

Lodoicea\_maldivica\_RM  
Sample\_H  
TATCCATTCTTTCTTTAGCACTCTTGGATTACTGACAGCTTGTAGGTTGC 367  
TATCCATTCATTTTCTAGCACGTTTGGATTATTGATGGCTTATAGATTGC 439  
\*\*\*\*\* \*\* \* \*\*\*\*\* \*\*\*\*\* \*\* \*\*\*\*\*

Lodoicea\_maldivica\_RM  
Sample\_H  
TGCCCTTGGCAGAGCCGCAGAAGCAATATGCTGATGTCGTAATCGAAGTT 417  
-GACCCTGGCAGACCCACAGAAGCAATATGCTGATGTCGTAATGAAGTT 488  
\* \*\* \*\*\*\*\* \*\* \*\*\*\*\*

Lodoicea\_maldivica\_RM  
Sample\_H  
TTACCGACACAATTAATTCCTGGTGACAAAGAAAGGAAG----- 456  
TTACCGACACAATTAATTCCTGATGACAATGAAAGGAAGGTGCTGAGAGT 538  
\*\*\*\*\* \*\*\*\*\*
